# Supplementary material
Source: Springer Nature journal article supplement (https://www.springermedizin.de/resource/supplementary/12984_2012_504_MOESM2_ESM.pdf/9604740)

# Biceps Femoris EMG

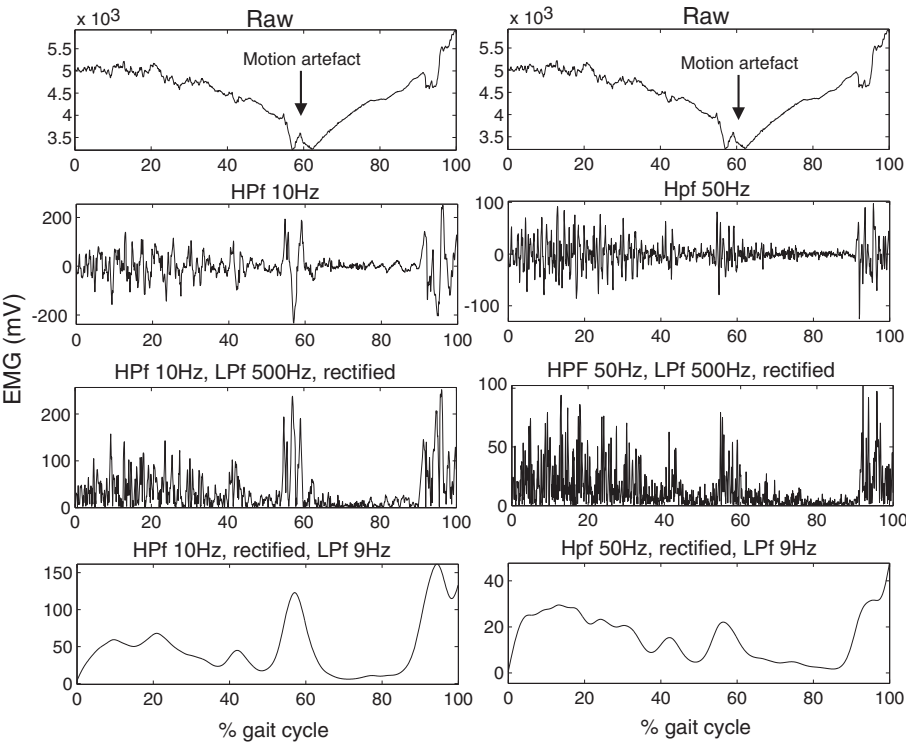

Supplement: MOESM2 [file 9604740]
